# Supplementary material for: Imaging the C black formation by acetylene pyrolysis with molecular reactive force field simulations
Source: Royal Society of Chemistry journal article supplement (doi:10.1039/c5cp00926j), 2015-01-01
Supplement: c5cp00926j1.pdf [file c5cp00926j1.pdf]

## **Imaging the C Black Formation by Acetylene Pyrolysis with Molecular Reactive Force Field Simulations**

Chaoyang Zhang, <sup>\*†</sup> Chi Zhang, <sup>†‡</sup> Yu Ma,<sup>†</sup> and Xianggui Xue<sup>†</sup>

<sup>†</sup> *Institute of Chemical Materials, China Academy of Engineering Physics (CAEP), P. O. Box 919-327, Mianyang, Sichuan 621900, China.*

<sup>‡</sup> *College of Chemistry and Chemical Engineering, Chongqing Universtiy, Chongqing 400044, China.*

### **Electronic Supplementary Information (ESI)**

#### **Table of Contents**

- s1. Comparison of pyrolysis evolutions under various conditions.
- s2. Evolution of C11-C20 under the condition of 0.1 g/cm<sup>3</sup> and 3500 K.
- s3. Evolution of C4, C6 particles under the condition of 0.01 g/cm<sup>3</sup>.
- s4. Evolution of total amount of all C particles under different conditions.

s1. Comparison of pyrolysis evolutions under various conditions.

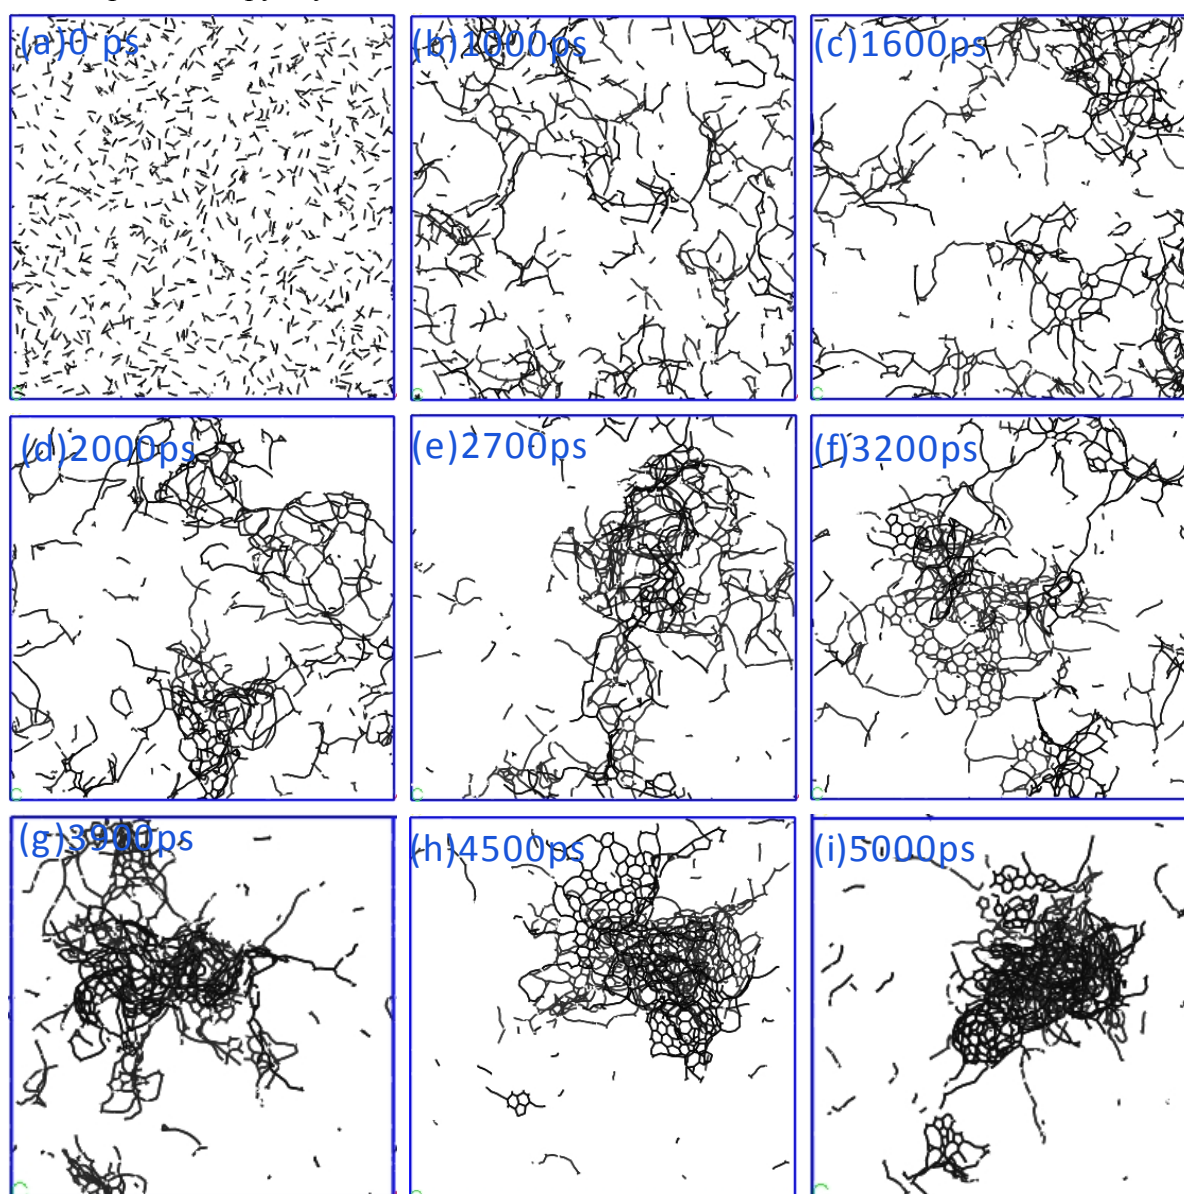

Fig. s1 Snapshots of acetylene pyrolysis as time proceeds under the condition of  $0.1\text{g/cm}^3$  and 3000 K. Only carbon atoms are exhibited. (a)-(i) correspond to 0, 1000, 1600, 2000, 2700, 3200, 3900, 4500 and 5000 ps, respectively.

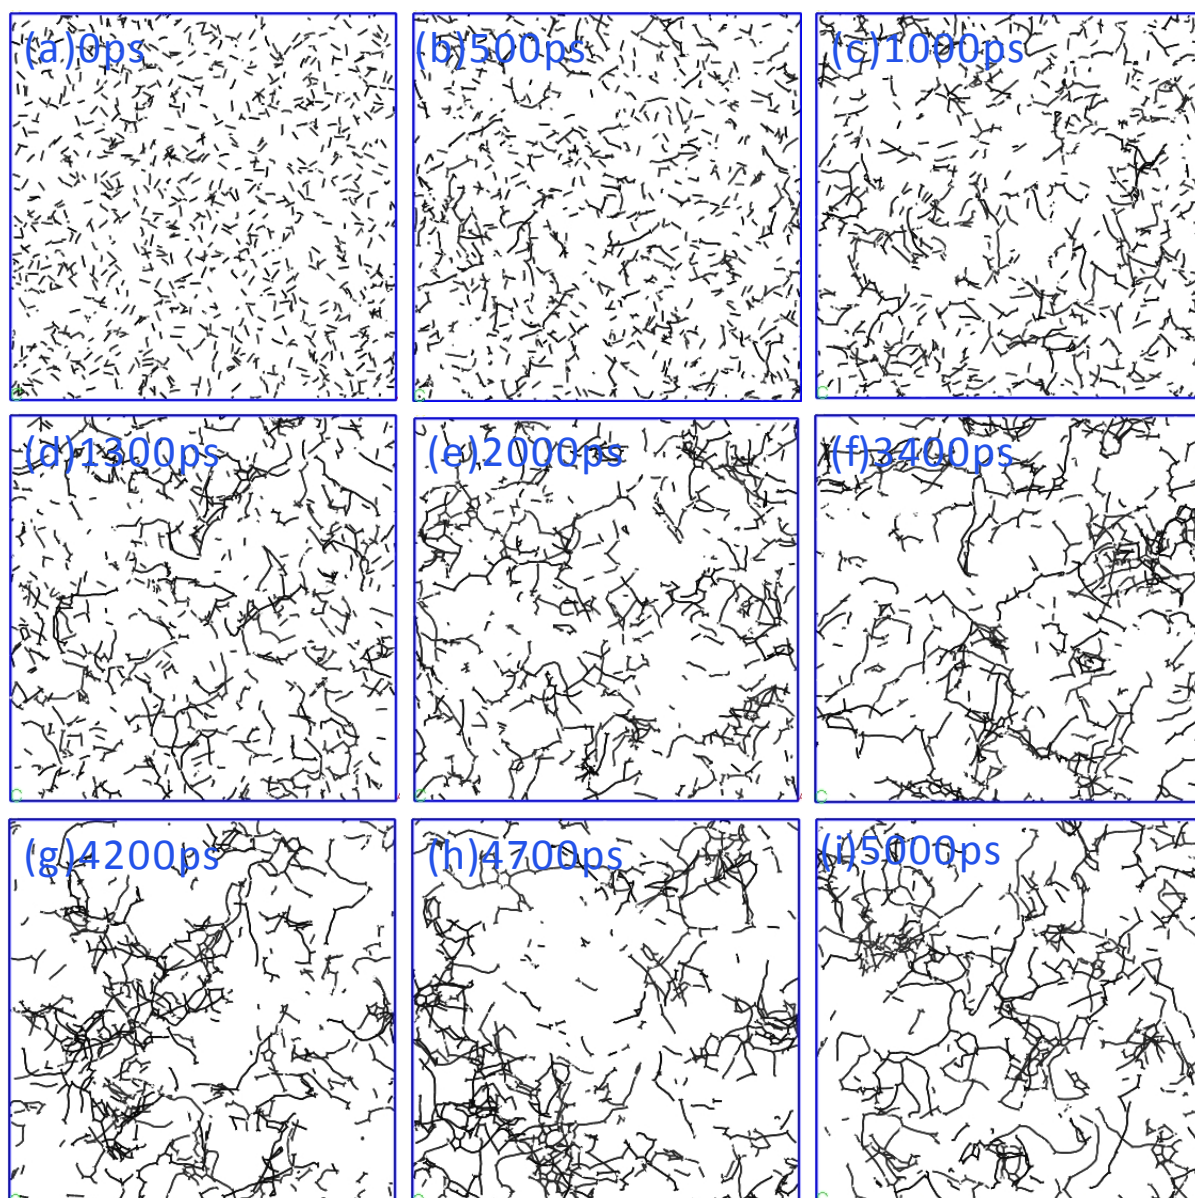

Fig. s2 Snapshots of acetylene pyrolysis as time proceeds under the condition of  $0.1\text{g/cm}^3$  and 2500 K. Only carbon atoms are exhibited. (a)-(i) correspond to 0, 500, 1000, 1300, 2000, 3400, 4200, 4700 and 5000 ps, respectively.

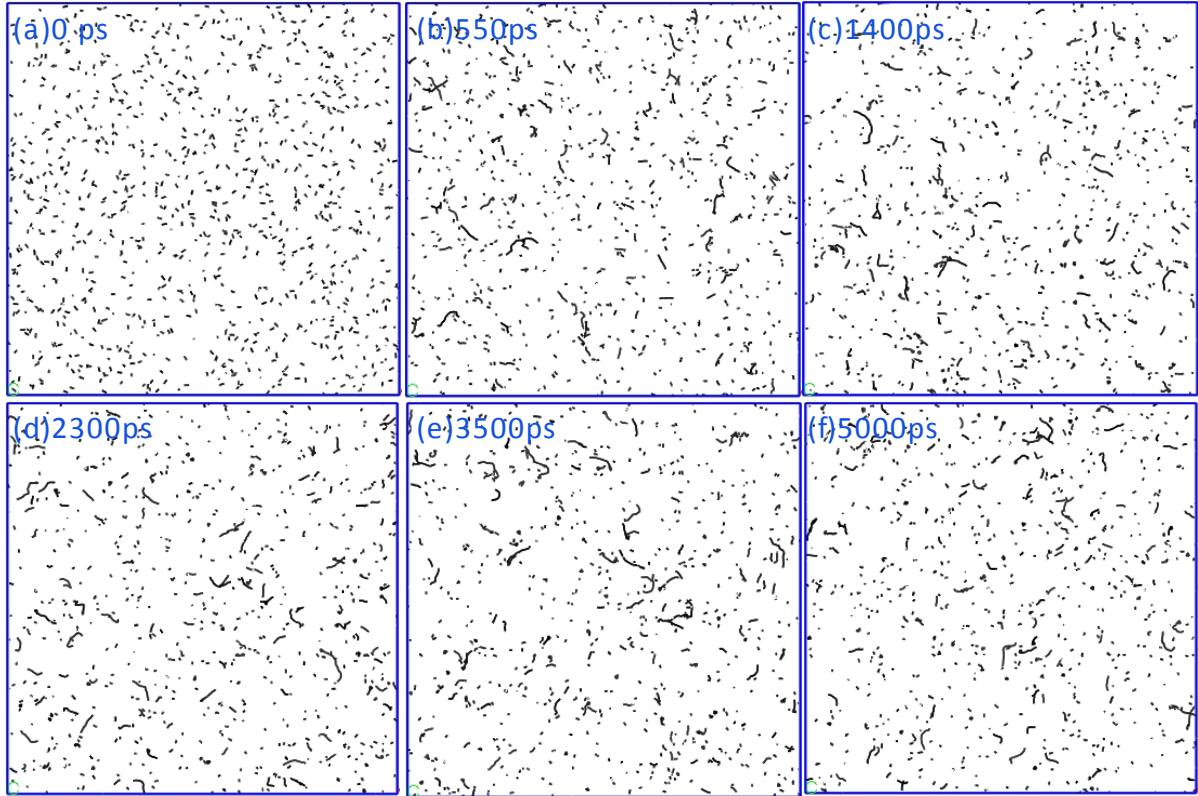

Fig. s3 Snapshots of acetylene pyrolysis as time proceeds under the condition of  $0.01\text{g/cm}^3$  and  $3500\text{ K}$ . Only carbon atoms are exhibited. (a)-(f) correspond to 0, 550, 1400, 2300, 3500 and 5000 ps, respectively.

Comparing the snapshots in Figs. s1-s3 with those in Fig. 2 of text, we find that the evolution processes under various conditions of densities and temperatures are similar, only with a difference of the evolution velocity. Therefore, we can employ the result of  $0.1\text{ g/cm}^3$  and  $3500\text{ K}$  for discussion, because the evolution tends to balance within the time limitation of simulations.

s2. Evolution of C11-C20 under the condition of 0.1 g/cm<sup>3</sup> and 3500 K

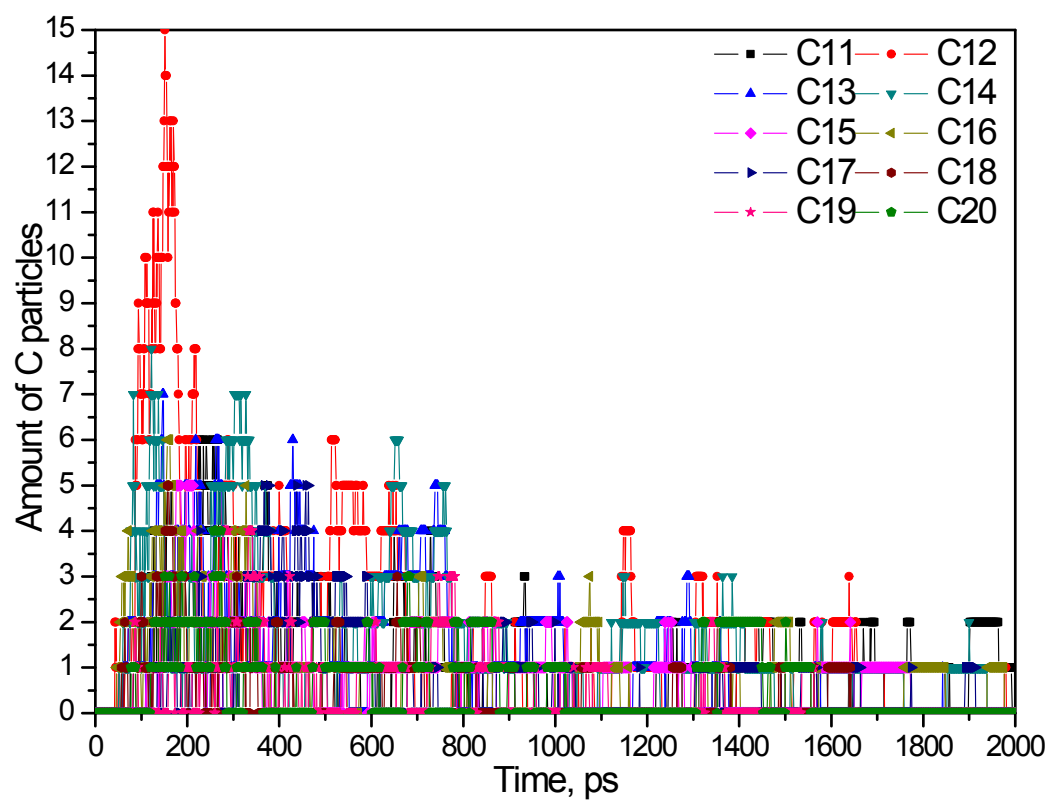

Fig. s4 Evolution of C11-C20 particles under the condition of 0.1 g/cm<sup>3</sup> and 3500 K.

s3. Evolution of C4, C6 particles under the condition of 0.01 g/cm<sup>3</sup>.

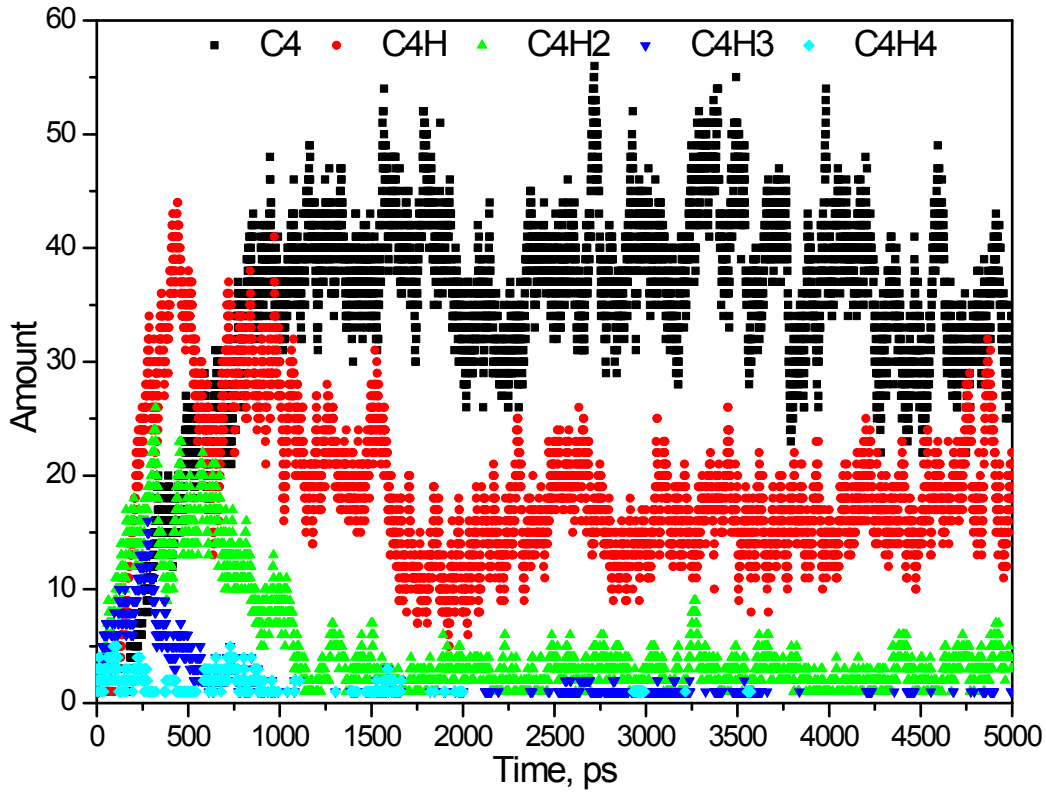

Fig. s5 Evolution of C4 under the condition of 0.01 g/cm<sup>3</sup> and 3500 K.

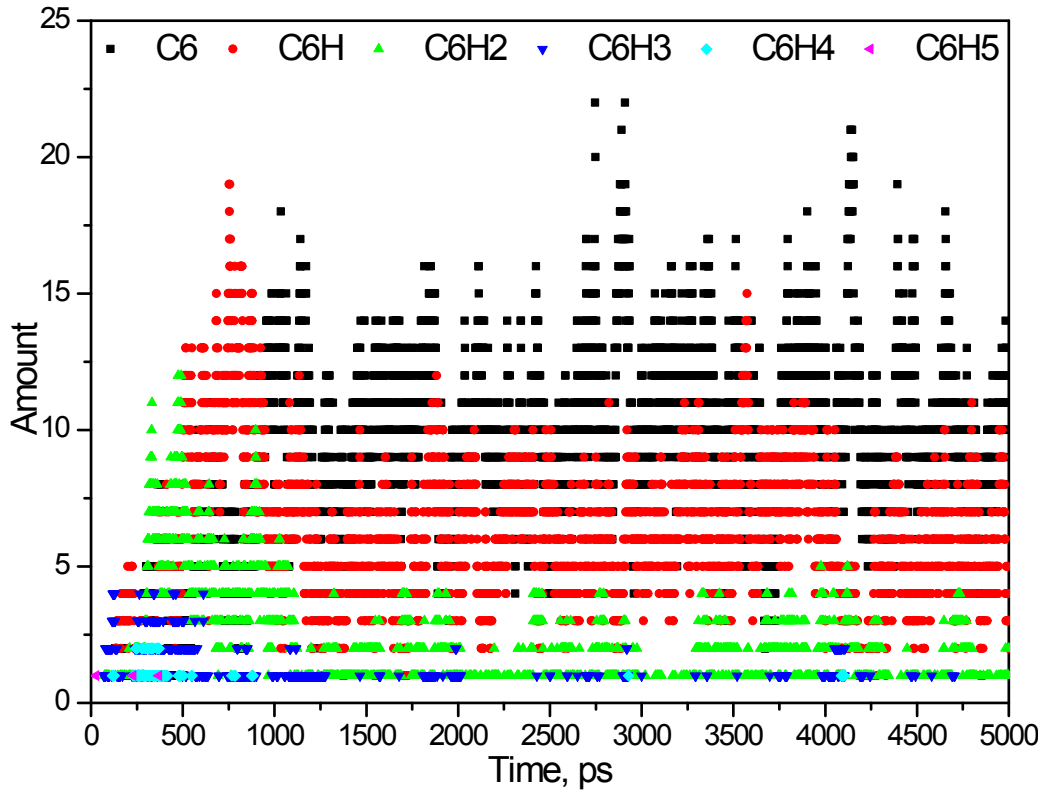

Fig. s6 Evolution of C6 under the condition of 0.01 g/cm<sup>3</sup> and 3500 K.



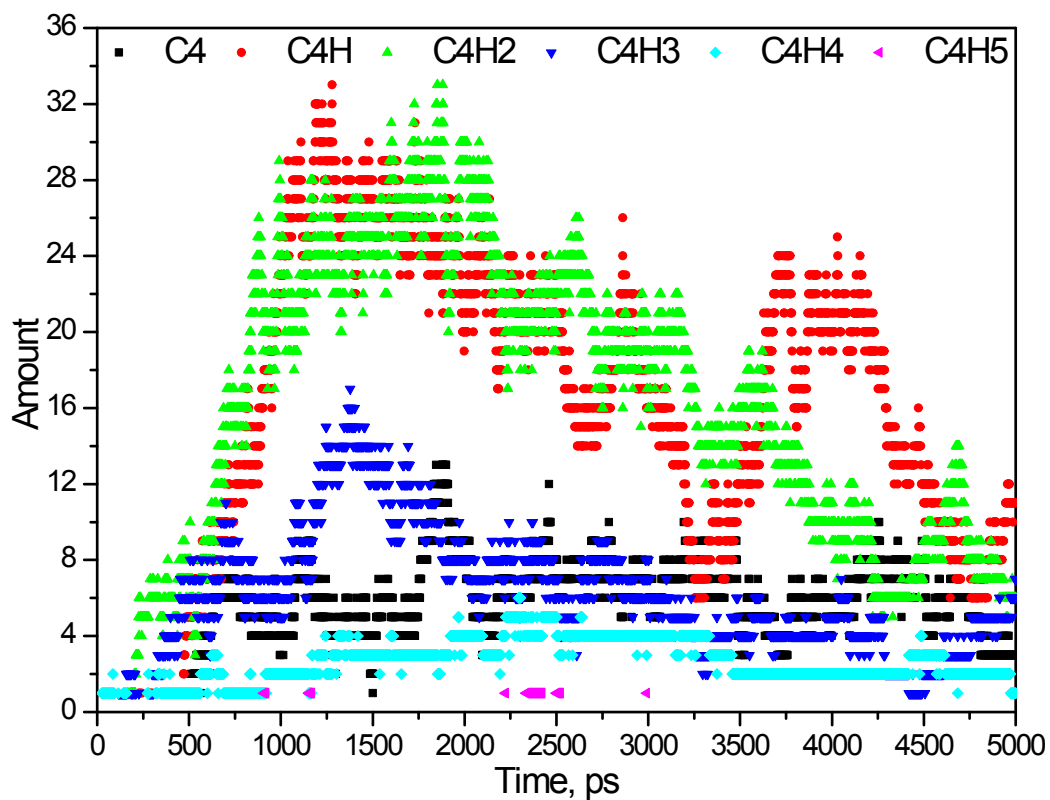

Fig. s7 Evolution of C4 under the condition of 0.01 g/cm<sup>3</sup> and 2500 K.

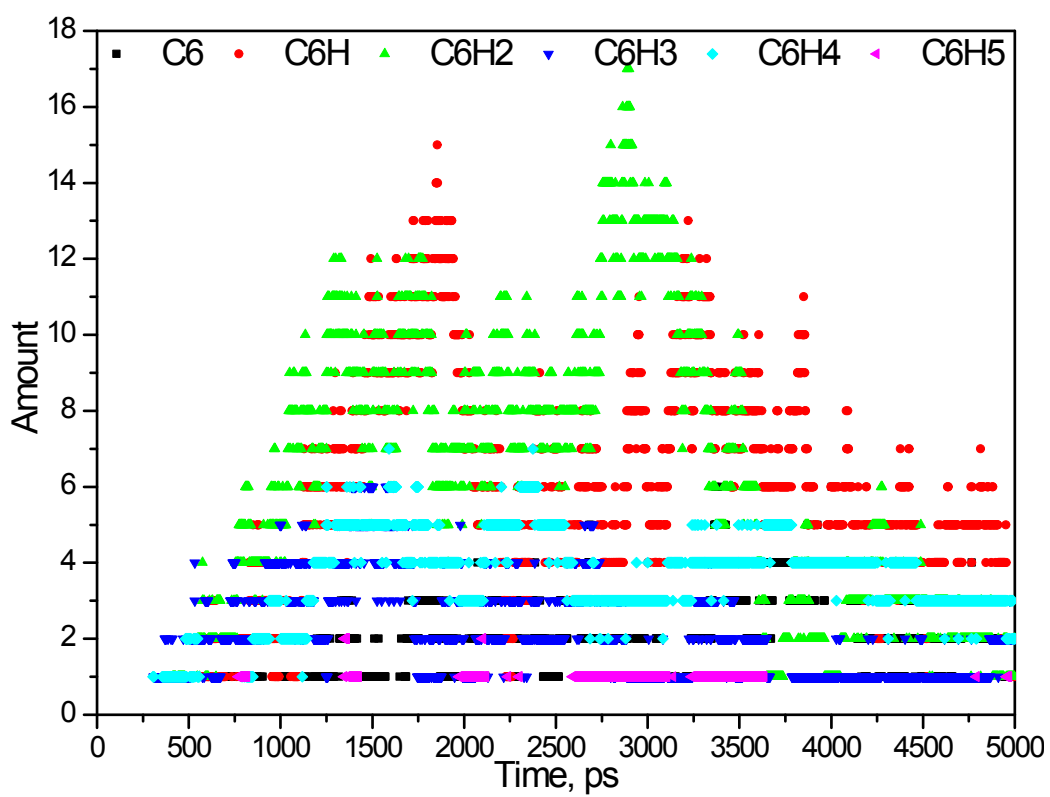

Fig. s8 Evolution of C6 under the condition of 0.01 g/cm<sup>3</sup> and 2500 K.

s4. Evolution of total amount of all C particles under different conditions.

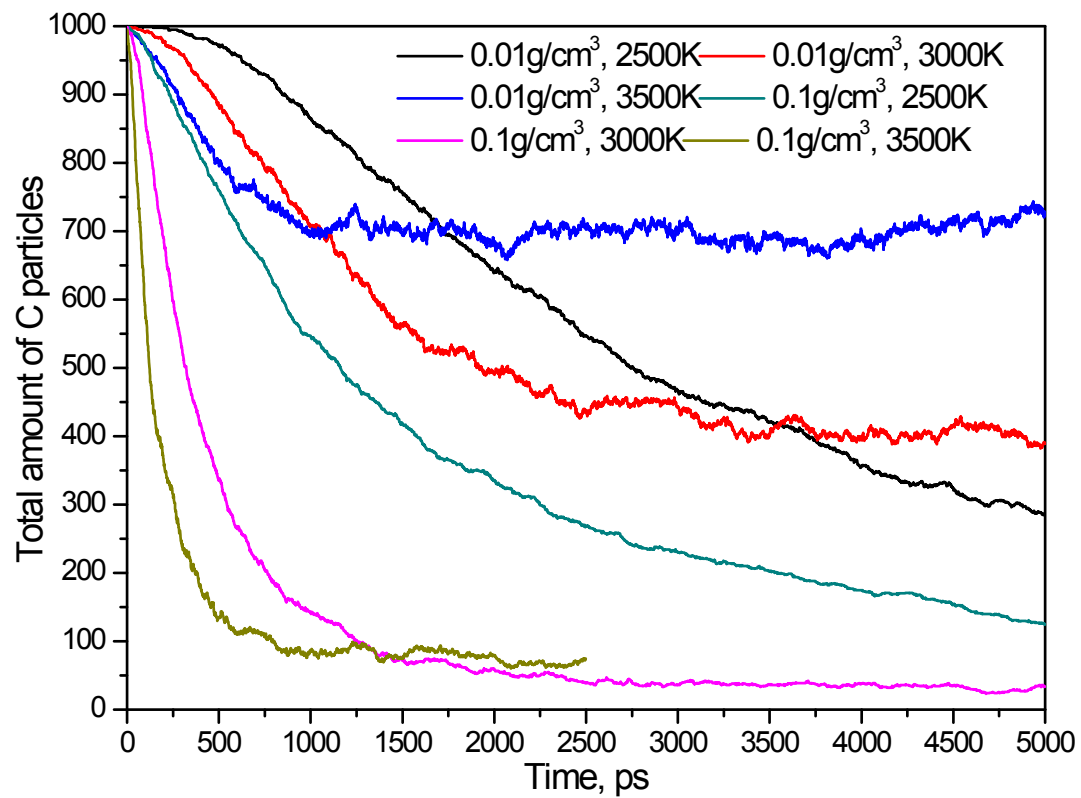

Fig. s9 Evolution of total amount of all C particles under different conditions.
